# Supplementary material for: Nuclear-Cytoplasmic Shuttling of the Usher Syndrome 1G Protein SANS Differs from Its Paralogue ANKS4B
Source: Preprints.org preprint supplement (doi:10.20944/preprints202407.2436.v1), 2024-07-30
Supplement: Supplementary file 1 [file supplementary]

Supplementary Material

Nucleocytoplasmic shuttling of the Usher syndrome 1G protein SANS differs from its paralogue ANKS4B

Jacques S. Fritze1, Felizitas F. Stiehler1, Uwe Wolfrum1#

1Institute of Molecular Physiology, Johannes Gutenberg University Mainz, Mainz, Germany

# Corresponding author: Uwe Wolfrum
[wolfrum@uni-mainz.de](mailto:wolfrum@uni-mainz.de)

**1. Supplementary Figures and Tables**

Supplementary_Figure_File.docx: all Figures S1-S5 referred to in this work;

Table_S1.xlsx: GO-term analysis of SANS nuclear interactome from (Yildirim et al. 2021)

CellProfiler workflow available on GitHub:

<https://github.com/LabWolfrum/Fritze_et_al_2024_SANS_Nuclear_localization>

- 1. **Supplementary Figures**

**Figure S1:**


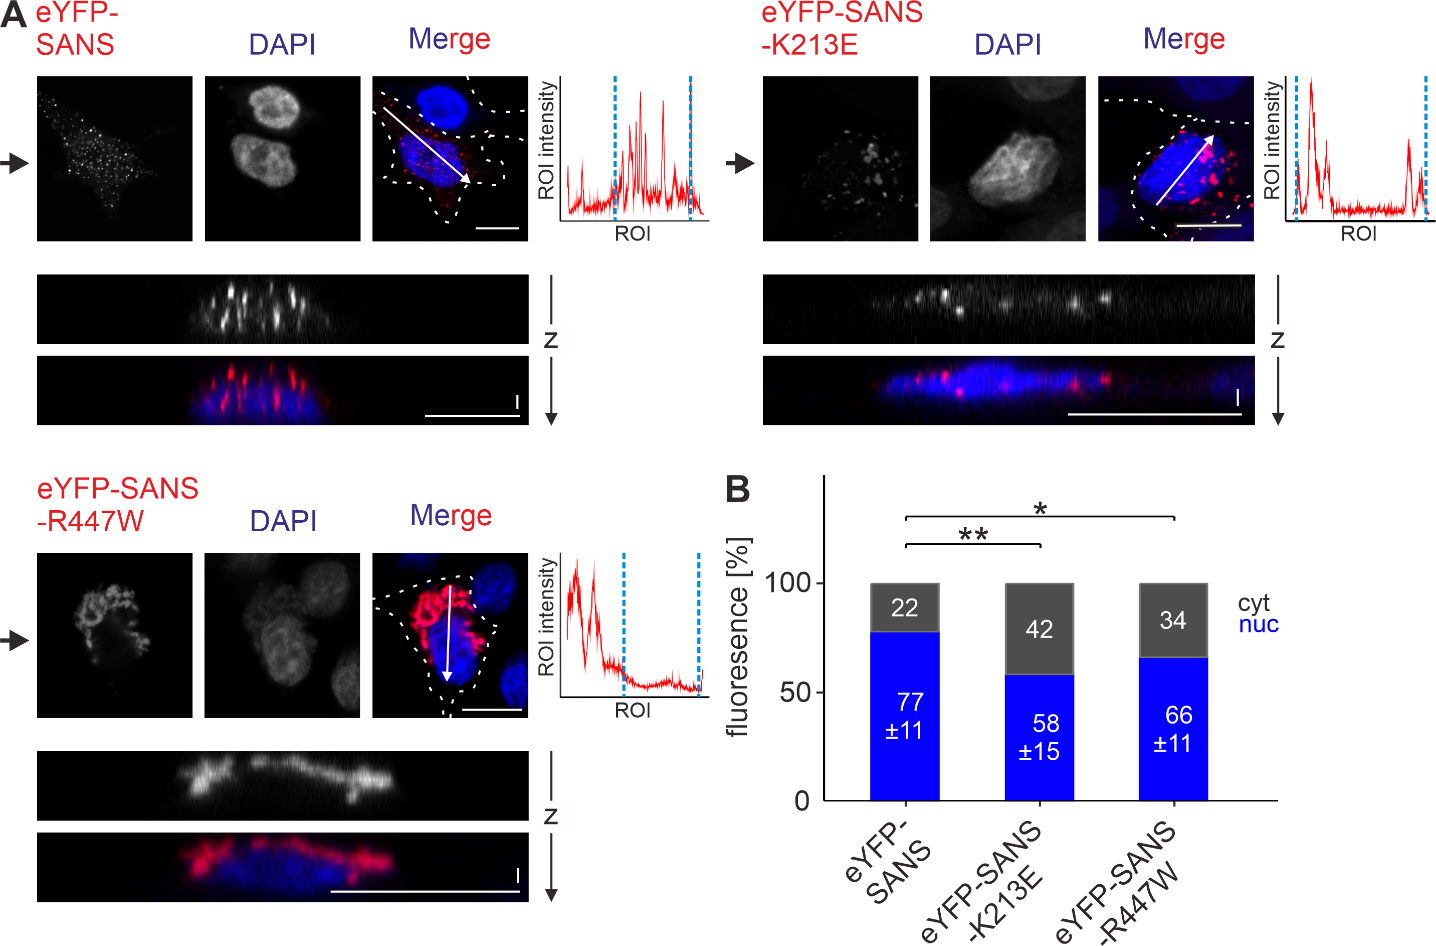


**Figure S1.** **Subcellular localization of SANS NLS mutants in HEK293T cells.** **(A)** Confocal microscopy of HEK293T cells transfected with eYFP-SANS (red) or SANS NLS mutants, counterstained with DAPI. **(B)** Quantification of (A)by CellProfiler. eYFP-SANSK213E and eYFP-SANSR447W differed significantly from eYFP-SANS. White arrows in merge images: regions of interests (ROI) of fluorescence intensity plots; blue dashed lines: DAPI positive nuclear extension; black arrows: position of Z-projections. Scale bars: horizontal = 10 µm; vertical = 2 µm. Students t-test was performed for 3 independent experiments with a minimum of 75 cells.

**Figure S2:**


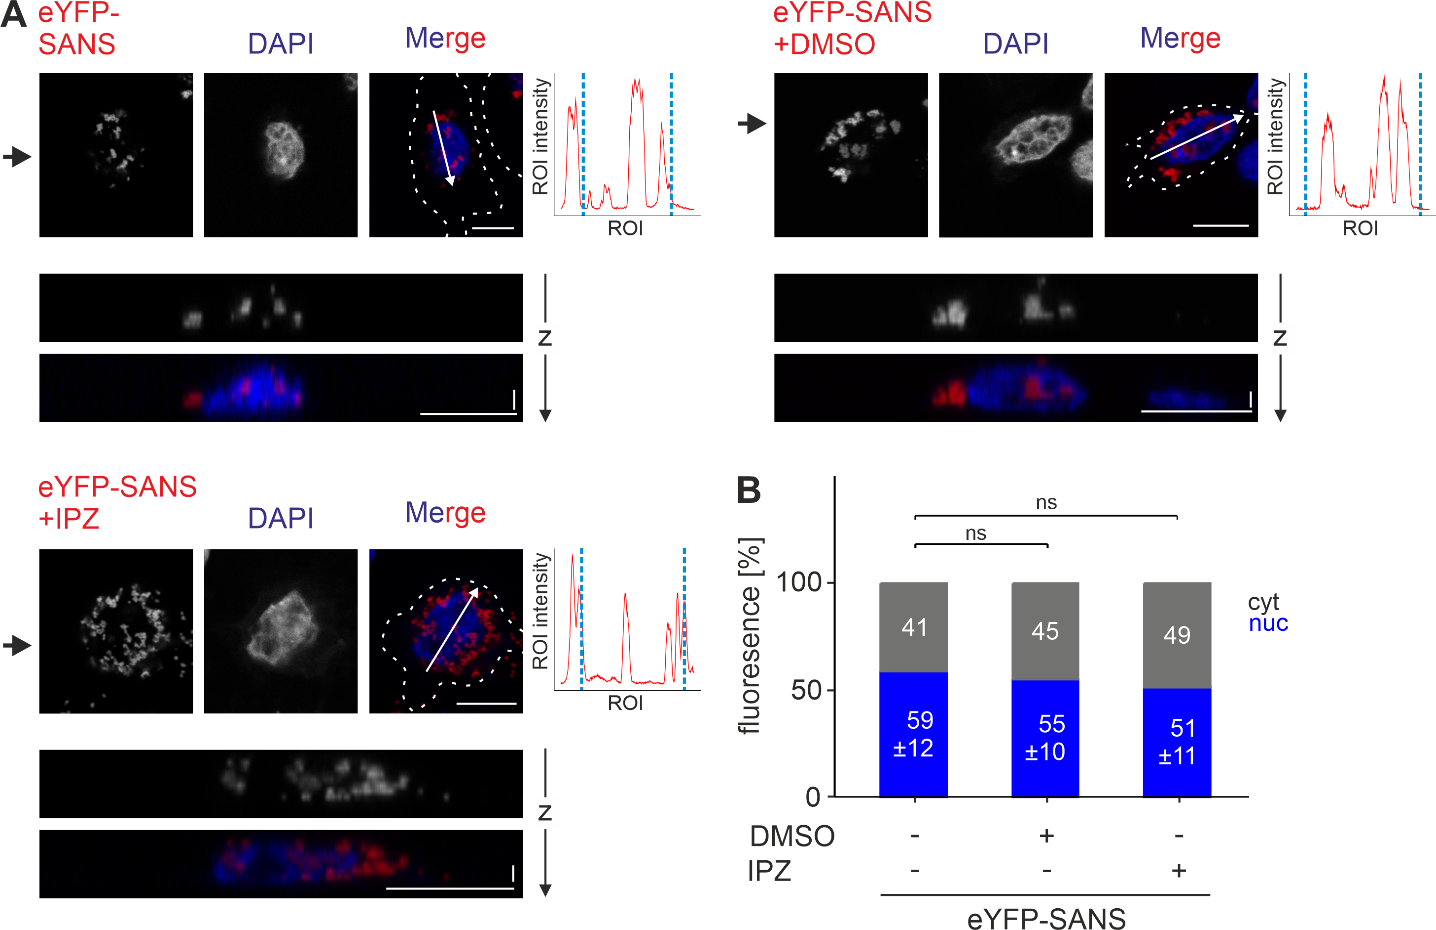


**Figure S2. Nuclear localization of eYFP-SANS treated with Importazole.** **(A)** Confocal microscopy of HeLa cells transfected with eYFP-SANS (red) and treated with DMSO or 40 µM Importin-β inhibitor Importazole (IPZ). **(B)** Quantification of (A)by CellProfiler. eYFP-SANS did not differ in its localization after IPZ treatment. White arrows in merge images: regions of interests (ROI) of fluorescence intensity plots; blue dashed lines: DAPI positive nuclear extension; black arrows: position of Z-projections. Scale bars: horizontal = 10 µm; vertical = 2 µm. Students t-test was performed for three independent experiments with a minimum of 75 cells.

**Figure S3:**


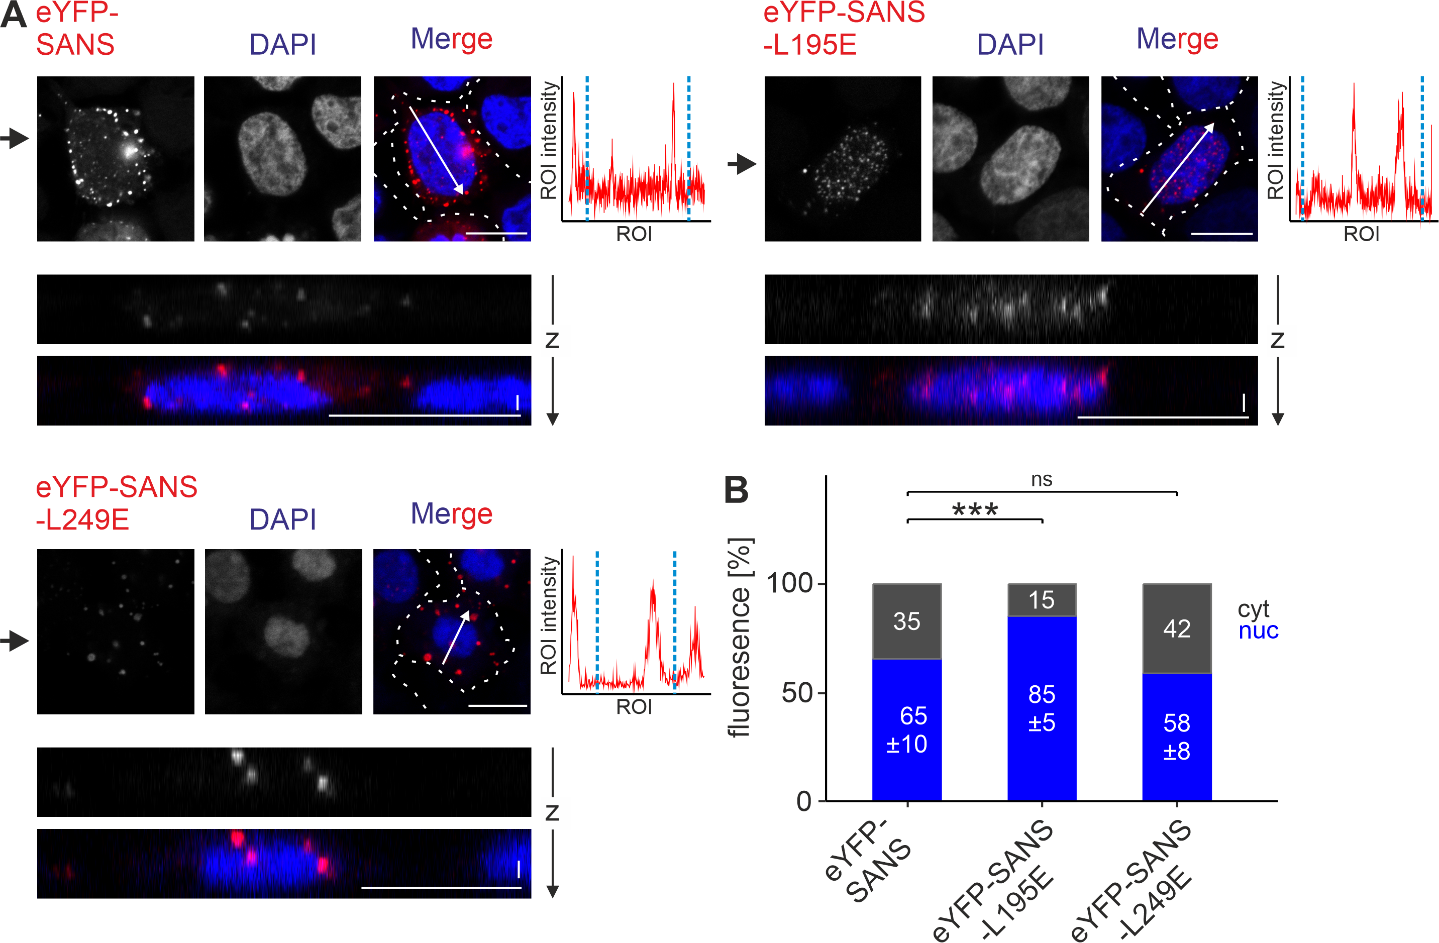


**Figure S3.** **Localization of SANS NES mutants in HEK293T cells.** **(A)** Confocal microscopy of HEK293T cells transfected with eYFP-SANS (red) or NES mutants, counterstained with DAPI. **(B)** Quantification of (A)by CellProfiler. eYFP-SANSL195E was significantly enriched in the nucleus compared to eYFP-SANS. White arrows in merge images: regions of interests (ROI) of fluorescence intensity plots; blue dashed lines: DAPI positive nuclear extension; black arrows: position of Z-projections. Scale bars: horizontal = 10 µm; vertical = 2 µm. Students t-test was performed for 3 independent experiments with a minimum of 75 cells.

**Figure S4:**


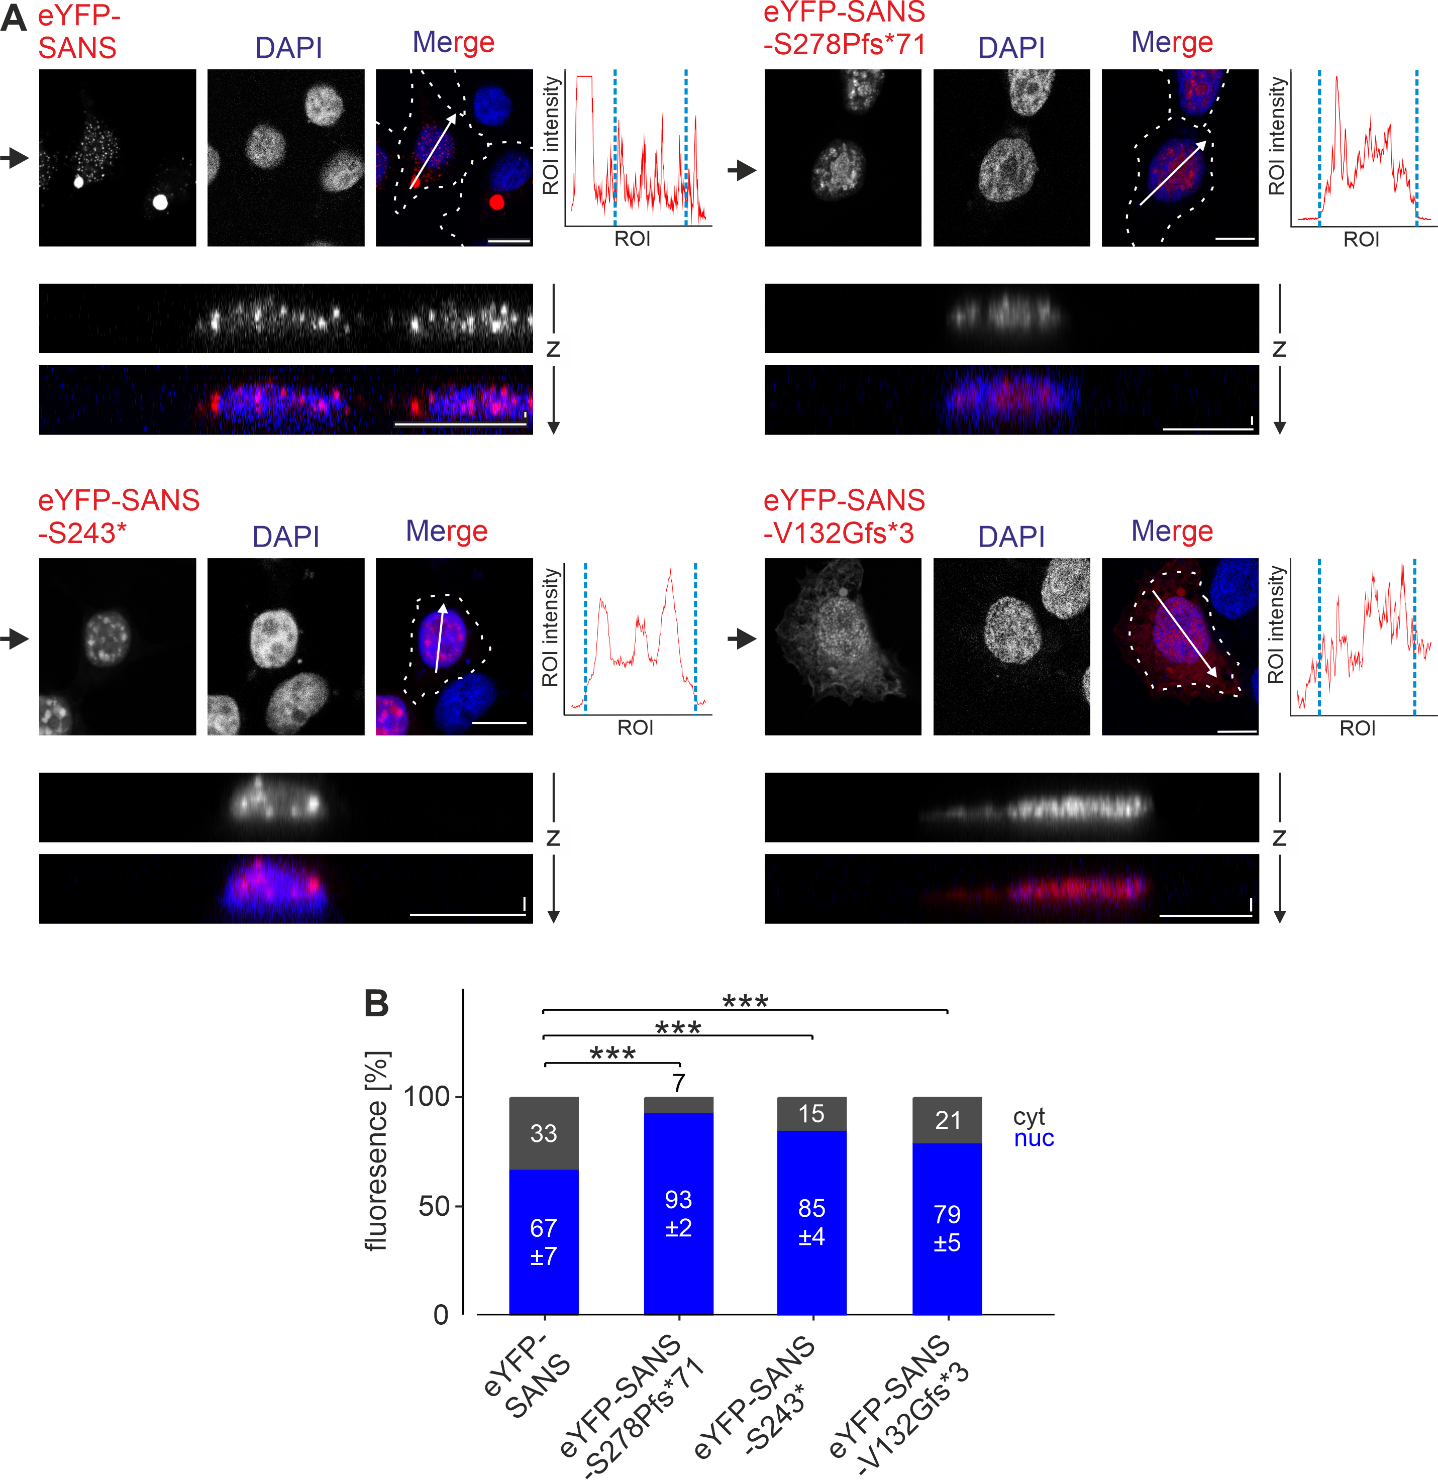


**Figure S4.** **Localization of pathogenic variant of SANS in HEK293T cells.** **(A)** Confocal microscopy of HEK293T cells transfected with eYFP-SANS (red), eYFP-SANSS278Pfs*71, eYFP-SANSS243* and eYFP-SANSV132Gfs*3, counterstained with DAPI. **(B)** Quantification of (A)with CellProfiler. All pathogenic variants were significantly enriched in the nucleus. White arrows in merge images: regions of interests (ROI) of fluorescence intensity plots; blue dashed lines: DAPI positive nuclear extension; black arrows: position of Z-projections. Scale bars: horizontal = 10 µm; vertical = 2 µm. Students t-test was performed for 3 independent experiments with a minimum of 75 cells.

**Figure S5:**


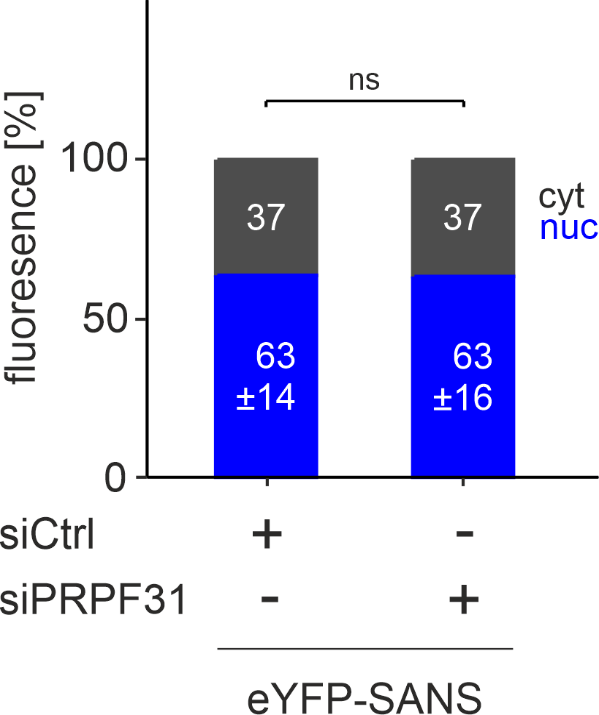


**Figure S5.** **Localization of eYFP-SANS under siRNA-based PRPF31 knock down in HeLa cells.** Quantification with CellProfiler. eYFP-SANS was not significantly enriched in the cytoplasm after siRNA-based knockdown of PRPF31. Students t-test was performed for 3 independent experiments with a minimum of 75 cells.
